## EARLY PHYLOGENETIC ESTIMATE OF THE EFFECTIVE REPRODUCTION NUMBER OF 2019-NCOV

Alessia Lai<sup>1,2</sup>, Annalisa Bergna<sup>1</sup>, Carla Acciarri<sup>1</sup>, Massimo Galli<sup>1,2</sup>, Gianguglielmo Zehender<sup>1,2,3\*</sup>

1 Department of Biomedical and Clinical Sciences "L.Sacco", University of Milan, Milano, Italy;

2 CRC-Coordinated Research Center "EpiSoMI", University of Milan, Milano, Italy

3 Romeo ed Enrica Invernizzi Pediatric Research Center

\*Correspondence: Gianguglielmo Zehender, PhD, PA,

Via G.B. Grassi 74, 20157, Milano

gianguglielmo.zehender@unimi.it; Tel.: +02-5031-9770

Running Head: PHYLOGENETIC ESTIMATE OF THE REPRODUCTION NUMBER OF 2019-NCOV

## ABSTRACT

To reconstruct the evolutionary dynamics of the 2019 novel coronavirus, 52 2019-nCoV genomes available on 04 February 2020 at GISAID were analysed.

The two models used to estimate the reproduction number (coalescent-based exponential growth and a birth-death skyline method) indicated an estimated mean evolutionary rate of  $7.8 \times 10^{-4}$  subs/site/year (range  $1.1 \times 10^{-4}$ – $15 \times 10^{-4}$ ).

The estimated R value was 2.6 (range 2.1-5.1), and increased from 0.8 to 2.4 in December 2019. The estimated mean doubling time of the epidemic was between 3.6 and 4.1 days.

This study proves the usefulness of phylogeny in supporting the surveillance of emerging new infections even as the epidemic is growing.

## INTRODUCTION

On 30 January 2020, the World Health Organisation (WHO) declared that the outbreak of an infection due to a novel coronavirus (2019-nCoV) was a “Public Health Emergency of International Concern” ([https://www.who.int/news-room/detail/30-01-2020-statement-on-the-second-meeting-of-the-international-health-regulations-\(2005\)-emergency-committee-regarding-the-outbreak-of-novel-coronavirus-\(2019-nCoV\)](https://www.who.int/news-room/detail/30-01-2020-statement-on-the-second-meeting-of-the-international-health-regulations-(2005)-emergency-committee-regarding-the-outbreak-of-novel-coronavirus-(2019-nCoV))). Emerging as a human pathogen in the Chinese city of Wuhan, 2019-nCoV ([https://www.who.int/docs/default-source/coronaviruse/situation-reports/20200121-sitrep-1-2019-ncov.pdf?sfvrsn=20a99c10\\_4](https://www.who.int/docs/default-source/coronaviruse/situation-reports/20200121-sitrep-1-2019-ncov.pdf?sfvrsn=20a99c10_4)) has caused a widespread outbreak of febrile respiratory illness and, as of 13 February 2020, there were 60,349 confirmed cases (including 527 outside mainland China) and a total of 1,360 fatalities (<https://gisanddata.maps.arcgis.com/apps/opsdashboard/index.html#/bda7594740fd40299423467b48e9ecf6>).

Belonging to the  $\beta$ -*coronavirus* genus of the *Coronaviridae* family, 2019-nCoV is closely related to SARS-CoV as there is >70% nucleotide similarity in their approximately 30 kb long genomes.<sup>1</sup> A recent study has supported the view that, like other  $\beta$ -*coronaviruses* causing human infections such as SARS-CoV and MERS-CoV, 2019-nCoV originated from bats, and reported 96% genomic identity with a previously detected SARS-like bat coronavirus.<sup>2,3</sup> However, it remains unclear whether the spillover also involved a different intermediary animal host.

In the case of such an epidemic, it is important to make an as reliable as possible estimate of the basic reproductive number ( $R_0$ , the number of cases generated from a single infected person) and the dynamics of transmission. The aim of this study was to investigate the temporal origin, rate of viral evolution and population dynamics of 2019-nCoV using 52 full genomes of viral strains sampled in different countries on known sampling dates available at the moment when study was performed.

## **MATERIALS AND METHODS**

### **Sequence data set**

The analysis was based on 52 2019-nCoV sequences publicly available at GISAID (Global Initiative on Sharing All Influenza Data) on 4 February 2020 (<https://www.gisaid.org/>). The accession IDs, sampling dates and locations are summarized in Table S1.

The sequences were aligned using the ClustalW Multiple Alignment program included in the accessory application of Bioedit software, manually controlled, and cropped to a final length of 29,774 bp using BioEdit v. 7.2.6.1 (<http://www.mbio.ncsu.edu/bioedit/bioedit.html>).

### **Phylodynamic analysis**

The simplest evolutionary model best fitting the sequence data was selected using software JmodelTest v.2.1.7 software,<sup>4</sup> and proved to be the Hasegawa-Kishino-Yano (HKY) model.

The virus' phylogeny, evolutionary rates, times of the most recent common ancestor (tMRCA) and demographic growth were co-estimated in a Bayesian framework using a Markov Chain Monte Carlo (MCMC) method implemented in v.1.84 of the BEAST package.<sup>5</sup>

Different coalescent priors and molecular clock models (constant population size, exponential growth, and a Bayesian skyline plot, BSP) were tested using strict and relaxed molecular clock models. Given the large credibility interval and high level of uncertainty due to very close sampling dates, all the estimates were made using days as the unit of time and a normal prior with substitution rates obtained from our preliminary estimates (mean rate  $2.2 \times 10^{-6}$  subs/site/day, with a standard deviation of  $1.1 \times 10^{-6}$ ).

The MCMC analysis was run until convergence with sampling every 100,000 generations. Convergence was assessed by estimating the effective sampling size (ESS) after 10% burn-in using Tracer v.1.7 software (<http://tree.bio.ed.ac.uk/software/tracer/>), and accepting ESS values of 300 or more. The uncertainty of the estimates is indicated by 95% highest marginal likelihoods estimated<sup>6</sup> by path sampling/stepping stone methods.<sup>7</sup>

The final trees were summarised by selecting the tree with the maximum product of posterior probabilities (pp) (maximum clade credibility or MCC) after a 10% burn-in using Tree Annotator v.1.84 (included in the BEAST package), and were visualised using FigTree v.1.4.2 (<http://tree.bio.ed.ac.uk/software/figtree/>).

The basic reproductive number ( $R_0$ ) was calculated on the basis of the exponential growth rate ( $r$ ) using the equation  $R_0=rD+1$ , where  $D$  is the average duration of infectiousness estimated as described below.<sup>8</sup> The doubling time of the epidemic was directly estimated setting the tree prior to the coalescent exponential growth analysis with doubling time parameterization.

#### **Birth-Death Skyline estimates of the effective reproductive number ( $R_e$ )**

The birth-death skyline model implemented in Beast 2.48 was used to infer changes in the effective reproductive number ( $R_e$ ), and other epidemiological parameters such as the death/recovery rate ( $\delta$ ), the transmission rate ( $\lambda$ ), the origin of the epidemic, and the sampling proportion ( $\rho$ ).<sup>9</sup> Given that the samples were collected during a short period of time, a “birth-death contemporary” model was used.

The analyses were based on the previously selected HKY substitution model and the substitution rate was set to the value of  $8.0 \times 10^{-4}$  subs/site/year, which corresponds to the mean substitution rate estimated using a relaxed clock under the exponential coalescent model as transformed into units per year.

For the birth-death analysis, one and two intervals and a log-normal prior for  $R_e$ , with a mean ( $M$ ) of 0.0 and a variance ( $S$ ) of 1.0 were chosen, which allows the  $R_e$  values to change between  $<1$  (0.193) to  $>5$ . A normal prior with  $M=48.7$  and  $S=15$  (corresponding to a 95% interval from 24.0 to 73.4) was used for the rate of becoming uninfected. These values are expressed as units per year and reflect the inverse of the time of infectiousness (5.3-19 days, mean 7.5) according to the serial interval estimated by Qun Li *et al.*<sup>10</sup> Sampling probability ( $\rho$ ) was estimated assuming a prior Beta ( $\alpha=1.0$  and  $\beta=999$ ), corresponding to a minority of the sampled cases (between  $10^{-5}$  to  $10^{-3}$ ). The origin of the epidemic was estimated using a normal prior with  $M=0.1$  and  $S=0.05$  in units per year.

The MCMC analyses were run for 30 million generations and sampled every 3,000 steps.

Convergence was assessed on the basis of ESS values (ESS  $>200$ ). Uncertainty in the estimates was indicated by 95% highest posterior density (95%HPD) intervals.

The mean growth rate was calculated on the basis of the birth and recovery rates ( $r=\lambda-\delta$ ), and the doubling time was estimated by the equation: doubling time= $\ln(2)/r$ .<sup>11</sup>

## RESULTS

The sequence analyses under a relaxed (uncorrelated log-normal) or strict molecular clock showed that the former performed better as assessed by using BF with path sampling (PS) and stepping stone sampling (SS) (strict vs. relaxed molecular clock BF(PS)=-8.66 and BF(SS)=-10.7 for relaxed clock). Comparison of the different demographic models showed that the BSP model best fitted the data (BSP vs. exponential growth BF(PS)= 7.3 and BF(SS)= 8.78 for BSP; BSP vs. constant population size BF(PS)= 7.3 and BF(SS)= 8.78 for BSP). The estimated mean evolutionary rate was  $2.15 \times 10^{-6}$  subs/site/day (95% HPD:  $3.22 \times 10^{-7}$ – $4.18 \times 10^{-6}$ ), corresponding to  $7.8 \times 10^{-4}$  subs/site/year (95% HPD:  $1.1 \times 10^{-4}$ – $15 \times 10^{-4}$ ).

The estimated mean tMRCA corresponding to the root of the tree dated 73 days before the end of January 2020 (95%HPD: 32.5–142.3), corresponding to 18 November 2019 (95%HPD: 10 September 2019–28 December 2019).

The Bayesian tree showed three main significant clades. The largest clade (pp=0.84) encompassed 10 sequences and consisted of two significant sub-clades (pp=0.9 and pp=1). Overall, this cluster included fewer recent isolates than the other two clusters, and dated back to 47.5 days ago (95% HPD: 25.5–76.6), corresponding to 13 December 2019. The second (pp=0.99) and third significant clusters (pp=0.95) dated back to 29.2 (95% HPD: 0.7–47.45) and 21.9 (95% HPD 3.6–54.7) days ago, corresponding to 01–08 January 2020.

The Bayesian skyline plot showed a rapid increase in the number of infections in a period between about 45 and 30 days before the end of January 2020 (Fig.1, part A).

The IDs and available data of the sequences involved in the clades are shown in Table S1.

The estimated growth rate under the exponential growth model was  $0.218 \text{ days}^{-1}$ , corresponding to an  $R_0$  estimation of 2.6 (credibility interval: 2.1–5.1). The direct estimation of the doubling time of the epidemic gave a mean 3.6 days (varying from 1.0 to 7.7). Figure 1 (part B) shows the Bayesian birth-death skyline plot of the  $R_e$  estimates with 95%HPD, and indicates that  $R_e$  increased from  $<1$  (mean 0.8, 95%HPD: 0.3–1.3) to a mean value of 2.4 (95%HPD: 1.5–3.5) in December 2019, and has since remained at this value.

Table 1 shows the parameters estimated using the birth-death skyline plot. The epidemic originated an estimated mean 3.7 months (credibility interval 3–4) before the present (BP), corresponding to October-

November 2019, before the root tree (3.6 months BP). The estimated recovery rate (the time to becoming non-infectious) was 7.3 days (CI 4.7-16.5 days), whereas the transmission rate ( $\lambda$ ) increased from 40.5 to 112.4 in units per year in December 2019. On the basis of these values, the growth rate in the second period is  $r=0.17$  (0.16-0.19), corresponding to a mean doubling time of 4.1 days (range 3.9-4.3).

## DISCUSSION

The 2019-nCoV epidemic is unique in the history of human infectious diseases not only because it is caused by a novel virus, but also because of the immediate availability of epidemiological and genomic data (the first entire genome was published on 24 December 2019). The prompt availability of research data on internet platforms such as the GISAID has allowed us and other research groups to make a phylogenetic reconstruction of the origin of 2019-nCoV and to share these findings with other scientists.

The temporal reconstruction of the 2019-nCoV phylogeny obtained in the present study is in line with previous estimates and suggests that the epidemic originated between October and November 2019, several weeks before the first cases were described. This was confirmed by means of coalescent analysis and the birth-death method of estimating the origin of the epidemic. The estimated evolutionary rate is also in line with that of SARS and MERS viruses,<sup>12,13</sup> and the recent estimates concerning 2019-nCoV (<http://virological.org/t/phylogenetic-analysis-67-genomes-08-feb-2020/356>).

One of the most important epidemiological parameters when monitoring an epidemic is  $R_0$  (i.e. the number of secondary cases induced by a single infected individual in a totally susceptible population) because it is fundamental to assess the potential spread of a micro-organism. Its value changes during an epidemic being called the effective reproduction number ( $R_e$ ).  $R_0$  is usually estimated on the basis of the growth rate of the number of cases. The available epidemiological estimates of 2019-nCoV  $R_0$  range from 2.2 to 2.9, although they changed from 1.4 to  $>7$  during the first phases of the epidemic.<sup>10,14</sup>

Recently developed evolutionary models have made it possible to estimate epidemiological parameters on the basis of phylogenesis,<sup>9,15</sup> and a coalescent and a birth-death methods were used to estimate  $R_0$  and the changes in the  $R_e$  of the 2019-nCoV epidemic during a short period of time. This has allowed us to make a preliminary estimate that mean  $R_0$  from the beginning of the epidemic to the first days of February 2020 was 2.2 (range 3.6-5.8), and the birth-death skyline analysis showed an increase in  $R_e$  from  $<1$  to 2.4 (CI 1.5-3.5) during December 2019. This agrees with the BSP analysis showing an increase in the number of infections in the same period of time.

On the same basis, the estimated epidemic doubling time was 3.6 days with a credibility interval between 1 to 7 days. We also tried to calculate it on the basis of the transmission ( $\lambda$ ) and recovery rate ( $\delta$ ) estimated



using the birth-death model, which lead to an estimated mean doubling time of 4.1 days, with the most probable values falling between 3.9 and 4.3 days. Previous studies have suggested that the doubling time during the early phases of the epidemic was about 7.4 days.<sup>10</sup> The difference in the estimate here obtained, may be due to the increased epidemic growth rate observed during the last days of January, or the initial delay in recognising and reporting new cases.

This preliminary study has some limitations. The  $R$  values and doubling times were estimated phylogenetically using all of the whole genomes available in a public database at the time the study was carried out (<https://www.gisaid.org/>). Given the small number of sequences and the relatively short sampling period, the credibility intervals are wide and limit the precision of the estimates. Moreover, the analysis included isolates collected outside mainland China as it is assumed that they all belong to the same epidemic originating in Wuhan.

Serial intervals were used to estimate the duration of infectiousness, although we do not yet have any information concerning the possible existence and duration of a latent (pre-infectious) period that would contribute to the serial interval.

More detailed and accurate analyses can be made when a larger number of genomes and more precise data on the infectious period become available. However, although the  $R_0$  calculated on the basis of the direct observation of the number of infected individuals may be affected by omissions or delayed notifications of cases,<sup>16</sup> a phylogenetic estimate of the same parameter may be more reliable.

This became particularly evident recently (on February 12, 2020) when the change in diagnosis classification led to a sudden increase in the reported cases by Hubei, China (<https://myemail.constantcontact.com/COVID-19-Updates---Feb-12.html?soid=1107826135286&aid=Kdg8a0rBTak>).

In conclusion, these results allowed us to make a phylogenetic estimate of the  $R_0$  of 2019-CoV infection that is similar to that obtained using conventional epidemiological methods<sup>17</sup> ([https://www.who.int/news-room/detail/23-01-2020-statement-on-the-meeting-of-the-international-health-regulations-\(2005\)-emergency-committee-regarding-the-outbreak-of-novel-coronavirus-\(2019-ncov\)](https://www.who.int/news-room/detail/23-01-2020-statement-on-the-meeting-of-the-international-health-regulations-(2005)-emergency-committee-regarding-the-outbreak-of-novel-coronavirus-(2019-ncov))), and a possibly shorter estimated doubling time of the number of subjects involved at least during the early phases of the

epidemic. They also support the usefulness of phylodynamic as an important complement to classic approaches to the surveillance and monitoring of an emerging infection, even during the course of an epidemic.

## FIGURE LEGEND

**Fig. 1.** Part A: Bayesian Skyline plot of the 2019-nCoV outbreak. The Y axis indicates  $N_e$  and X axis shows the time in year units (0=January 30; 0.05=18.2 days; 0.1=36.5 days; 0.15=54.7 days and 0.2=73 days before). The thick solid line represents the median value of the estimates, and the grey area the 95% HPD. Part B: Birth-death skyline plot of the 2019-nCoV outbreak allowing two  $R_e$  intervals. The curve and the orange area show the mean  $R_e$  values and their 95% confidence intervals. The Y and X axes respectively represent  $R$  values and time in years.

## ACKNOWLEDGEMENTS

In memory of Li Wenliang, Carlo Urbani and of all the doctors and health workers who endangered their lives in the fight against epidemics.

We acknowledge the authors, originating and submitting laboratories of the sequences from GISAID.

## CONFLICTS OF INTEREST

The authors declare no conflict of interest.

## REFERENCES

1. Lu R, Zhao X, Li J, et al. Genomic characterisation and epidemiology of 2019 novel coronavirus: implications for virus origins and receptor binding. *Lancet (London, England)*. 2020.
2. Paraskevis D, Kostaki EG, Magiorkinis G, Panayiotakopoulos G, Sourvinos G, Tsiodras S. Full-genome evolutionary analysis of the novel corona virus (2019-nCoV) rejects the hypothesis of emergence as a result of a recent recombination event. *Infection, genetics and evolution : journal of molecular epidemiology and evolutionary genetics in infectious diseases*. 2020;79:104212.
3. Zhou P, Yang X-L, Wang X-G, et al. A pneumonia outbreak associated with a new coronavirus of probable bat origin. *Nature*. 2020.
4. Posada D. jModelTest: phylogenetic model averaging. *Molecular biology and evolution*. 2008;25(7):1253-1256.
5. Drummond AJ, Suchard MA, Xie D, Rambaut A. Bayesian phylogenetics with BEAUti and the BEAST 1.7. *Molecular biology and evolution*. 2012;29(8):1969-1973.
6. Suchard MA, Weiss RE, Sinsheimer JS. Bayesian selection of continuous-time Markov chain evolutionary models. *Molecular biology and evolution*. 2001;18(6):1001-1013.
7. Baele G, Lemey P, Bedford T, Rambaut A, Suchard MA, Alekseyenko AV. Improving the accuracy of demographic and molecular clock model comparison while accommodating phylogenetic uncertainty. *Molecular biology and evolution*. 2012;29(9):2157-2167.
8. Pybus OG, Charleston MA, Gupta S, Rambaut A, Holmes EC, Harvey PH. The epidemic behavior of the hepatitis C virus. *Science (New York, NY)*. 2001;292(5525):2323-2325.
9. Stadler T, Kuhnert D, Bonhoeffer S, Drummond AJ. Birth-death skyline plot reveals temporal changes of epidemic spread in HIV and hepatitis C virus (HCV). *Proceedings of the National Academy of Sciences of the United States of America*. 2013;110(1):228-233.
10. Li Q, Guan X, Wu P, et al. Early Transmission Dynamics in Wuhan, China, of Novel Coronavirus-Infected Pneumonia. *The New England journal of medicine*. 2020.

11. Walker PR, Pybus OG, Rambaut A, Holmes EC. Comparative population dynamics of HIV-1 subtypes B and C: subtype-specific differences in patterns of epidemic growth. *Infection, genetics and evolution : journal of molecular epidemiology and evolutionary genetics in infectious diseases*. 2005;5(3):199-208.
12. Lipsitch M, Cohen T, Cooper B, et al. Transmission dynamics and control of severe acute respiratory syndrome. *Science (New York, NY)*. 2003;300(5627):1966-1970.
13. Assiri A, McGeer A, Perl TM, et al. Hospital outbreak of Middle East respiratory syndrome coronavirus. *The New England journal of medicine*. 2013;369(5):407-416.
14. Liu T, Hu J, Kang M, et al. Transmission dynamics of 2019 novel coronavirus (2019-nCoV). *bioRxiv*. 2020:2020.2001.2025.919787.
15. Veo C, Della Ventura C, Moreno A, et al. Evolutionary Dynamics of the Lineage 2 West Nile Virus That Caused the Largest European Epidemic: Italy 2011-2018. *Viruses*. 2019;11(9).
16. Zhao S, Musa SS, Lin Q, et al. Estimating the Unreported Number of Novel Coronavirus (2019-nCoV) Cases in China in the First Half of January 2020: A Data-Driven Modelling Analysis of the Early Outbreak. *Journal of clinical medicine*. 2020;9(2).
17. Zhao S, Lin Q, Ran J, et al. Preliminary estimation of the basic reproduction number of novel coronavirus (2019-nCoV) in China, from 2019 to 2020: A data-driven analysis in the early phase of the outbreak. *International journal of infectious diseases : IJID : official publication of the International Society for Infectious Diseases*. 2020.

Table 1. Epidemiological parameters estimated by Birth-death skyline analysis.

| Parameter                | Mean Estimate | 95%HPD Low | 95%HPD Up |
|--------------------------|---------------|------------|-----------|
| <b>Re1</b>               | 0.8           | 0.29       | 1.3       |
| <b>Re2</b>               | 2.4           | 1.5        | 3.5       |
| <b>origin</b>            | 0.304         | 0.24       | 0.36      |
| <b>become uninfected</b> | 49.8          | 22.1       | 0.36      |
| <b>birt1</b>             | 40.46         | 7.9        | 73.8      |
| <b>birth2</b>            | 112.4         | 82.3       | 142.9     |
| <b>rho</b>               | 0.0044        | 0.00087    | 0.0086    |
| <b>tree-root tMRCA</b>   | 0.296         | 0.24       | 0.35      |

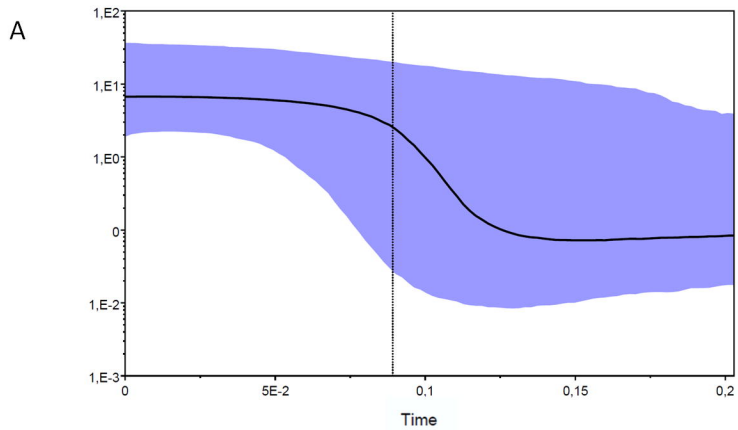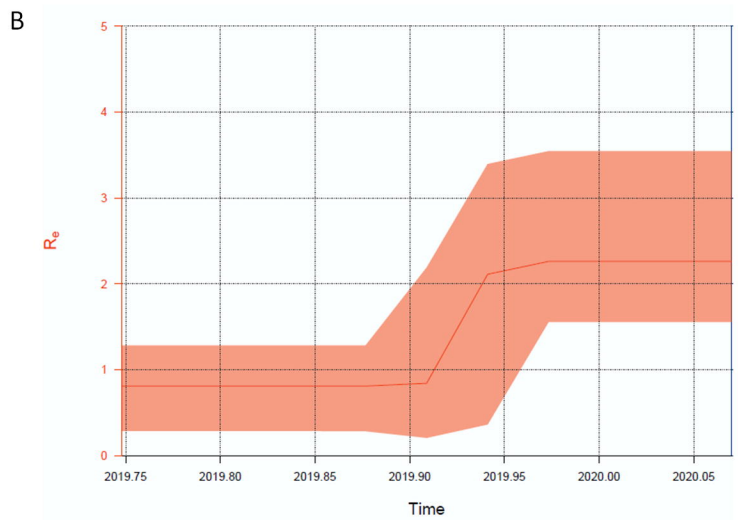

Source: https://medrxiv.org/content/medrxiv/early/2020/02/23/2020.02.19.20024851.full.pdf
